# Supplementary material
Source: PubMed Central journal article supplement (PMC3265202)
Supplement: supp_blood-2011-08-373910_Document1.pdf [file supp_blood-2011-08-373910_Document1.pdf]

**Table S1. Representation of all genes that are differentially expressed by at least 2 fold in restimulated helped versus helpless CD8<sup>+</sup> T cells**

| Ref Number | Gene Symbol   | Log2 Ratio | Num of Probes |
|------------|---------------|------------|---------------|
| NM_178894  | AA792892      | -2.88      | 1             |
| NM_029131  | 4930503E14Rik | -2.79      | 1             |
| NM_011022  | Ott           | -2.29      | 1             |
| NM_028244  | 2600005C20Rik | -2.09      | 1             |
| NM_172685  | Slc25a24      | -1.96      | 1             |
| NM_020019  | Magea6        | -1.85      | 1             |
| NM_022409  | Zfp296        | -1.84      | 1             |
| NM_019642  | Rpn2          | -1.81      | 1             |
| NM_053145  | Pcdhb20       | -1.8       | 1             |
| NM_010283  | Ggta1         | -1.72      | 1             |
| NM_178767  | A530016O06Rik | -1.72      | 1             |
| NM_207247  | Pglyrp3       | -1.63      | 1             |
| NM_011683  | V1ra1         | -1.62      | 1             |
| NM_008278  | Hpgd          | -1.62      | 1             |
| NM_133208  | Zfp287        | -1.61      | 1             |
| NM_153552  | Thoc1         | -1.6       | 1             |
| NM_011798  | Xcr1          | -1.59      | 1             |
| NM_145469  | Npal2         | -1.57      | 1             |
| NM_015803  | Atp8a2        | -1.54      | 1             |
| NM_172639  | 5330431N19Rik | -1.52      | 1             |
| NM_023066  | Asph          | -1.49      | 1             |
| NM_013589  | Ltbp2         | -1.47      | 1             |
| NM_176924  | 9530053A07Rik | -1.47      | 1             |
| NM_029031  | Car1          | -1.43      | 1             |
| NM_145546  | Gtf2b         | -1.43      | 1             |
| NM_145145  | Pomt1         | -1.43      | 1             |
| NM_023868  | Ryr2          | -1.41      | 1             |
| NM_015768  | Prok2         | -1.41      | 1             |
| NM_177041  | Flad1         | -1.41      | 1             |
| NM_177472  | Btbd12        | -1.41      | 1             |
| NM_008136  | Gna-rs1       | -1.41      | 1             |
| NM_011445  | Sox6          | -1.39      | 1             |
| NM_013584  | Lifr          | -1.31      | 1             |
| NM_053231  | V1rc1         | -1.31      | 1             |
| NM_177338  | Hmbox1        | -1.3       | 1             |
| NM_177545  | Vangl1        | -1.3       | 1             |
| NM_175497  | 4732495G21Rik | -1.28      | 1             |
| NM_029256  | Ccdc83        | -1.28      | 1             |
| NM_053244  | Kiss1r        | -1.28      | 1             |
| NM_008668  | Nab2          | -1.27      | 1             |
| NM_010275  | Gdnf          | -1.26      | 1             |
| NM_026454  | Ube2f         | -1.25      | 1             |
| NM_146348  | Olf1121       | -1.24      | 1             |
| NM_007727  | Cntn1         | -1.24      | 1             |
| NM_024221  | Pdhh          | -1.23      | 1             |
| NM_018751  | Sult1c1       | -1.23      | 1             |
| NM_009089  | Polr2a        | -1.23      | 1             |
| NM_172590  | Wdr41         | -1.22      | 1             |
| NM_133791  | Wwc2          | -1.22      | 1             |

| Ref Number | Gene Symbol   | Log2 Ratio | Num of Probes |
|------------|---------------|------------|---------------|
| NM_008675  | Nbl1          | -1.22      | 1             |
| NM_025575  | 2610042O14Rik | -1.21      | 1             |
| NM_021288  | Tyms          | -1.21      | 1             |
| NM_027629  | Pgm2l1        | -1.21      | 1             |
| NM_172716  | Pcgf3         | -1.2       | 1             |
| NM_177356  | Lamp3         | -1.2       | 1             |
| NM_008651  | Mybl1         | -1.18      | 1             |
| NM_011849  | Nek4          | -1.17      | 1             |
| NM_175939  | Adam29        | -1.17      | 1             |
| NM_152922  | Egfl8         | -1.16      | 1             |
| NM_145935  | Glyat         | -1.15      | 1             |
| NM_130903  | Cd209c        | -1.15      | 1             |
| NM_009986  | Cutl1         | -1.15      | 1             |
| NM_172882  | Wdfy3         | -1.14      | 1             |
| NM_010432  | Hipk1         | -1.14      | 1             |
| NM_153511  | Ilf9          | -1.14      | 1             |
| NM_175477  | Zfp574        | -1.14      | 1             |
| NM_027506  | Gulp1         | -1.13      | 1             |
| NM_008086  | Gas1          | -1.13      | 1             |
| NM_029697  | 1700128F08Rik | -1.12      | 1             |
| NM_007764  | Crkl          | -1.12      | 1             |
| NM_145355  | Rnf185        | -1.11      | 1             |
| NM_172282  | Tmco3         | -1.11      | 1             |
| NM_183424  | P518          | -1.1       | 1             |
| NM_028744  | Pi4k2b        | -1.1       | 1             |
| NM_177135  | D830030K20Rik | -1.09      | 1             |
| NM_145373  | BC010462      | -1.09      | 1             |
| NM_016883  | Psmc10        | -1.09      | 1             |
| NM_011703  | Vipr1         | -1.09      | 1             |
| NM_015789  | Dkk1l         | -1.08      | 1             |
| NM_015763  | Lpin1         | -1.08      | 1             |
| NM_146622  | Olf360        | -1.08      | 1             |
| NM_144904  | Rod1          | -1.08      | 1             |
| NM_023063  | Lima1         | -1.07      | 1             |
| NM_198308  | 4930402E16Rik | -1.07      | 1             |
| NM_010731  | Zbtb7a        | -1.07      | 1             |
| NM_030228  | Gas2l1        | -1.07      | 1             |
| NM_177670  | Tmem69        | -1.07      | 1             |
| NM_026820  | Ifitm1        | -1.07      | 1             |
| NM_025352  | Uqcrq         | -1.07      | 1             |
| NM_198666  | MGC58177      | -1.06      | 1             |
| NM_013709  | Sh3yl1        | -1.06      | 1             |
| NM_023266  | Zfp120        | -1.06      | 1             |
| NM_207225  | Hdac4         | -1.06      | 1             |
| NM_008077  | Gad1          | -1.06      | 1             |
| NM_197981  | 5930416I19Rik | -1.06      | 1             |
| NM_009726  | Atp7a         | -1.05      | 1             |
| NM_172525  | Arhgap29      | -1.04      | 1             |
| NM_026230  | H2afy3        | -1.04      | 1             |
| NM_175247  | Zfp28         | -1.04      | 1             |
| NM_011316  | Saa4          | -1.04      | 1             |
| NM_130863  | Adrbk1        | -1.04      | 1             |

| Ref Number | Gene Symbol   | Log2 Ratio | Num of Probes |
|------------|---------------|------------|---------------|
| NM_007693  | Chga          | -1.04      | 1             |
| NM_146426  | Olfra469      | -1.04      | 1             |
| NM_009302  | Swap70        | -1.04      | 1             |
| NM_028333  | Angptl1       | -1.03      | 1             |
| NM_011768  | Zfx           | -1.03      | 1             |
| NM_008489  | Lbp           | -1.02      | 1             |
| NM_027063  | 1700013G24Rik | -1.02      | 1             |
| NM_207140  | Olfra1212     | -1.02      | 1             |
| NM_020252  | Nrxn1         | -1.02      | 1             |
| NM_175025  | Atp2c1        | -1.02      | 1             |
| NM_027597  | 4921509E07Rik | -1.02      | 1             |
| NM_027872  | 1200006F02Rik | -1.01      | 1             |
| NM_153168  | Lars2         | -1.01      | 1             |
| NM_201355  | BC047219      | -1         | 1             |
| NM_026879  | Chmp2b        | 1          | 1             |
| NM_008950  | Psmc5         | 1          | 1             |
| NM_008464  | Klra6         | 1          | 1             |
| NM_019827  | Gsk3b         | 1          | 1             |
| NM_010612  | Kdr           | 1.01       | 1             |
| NM_153789  | Myliip        | 1.01       | 1             |
| NM_174853  | Disc1         | 1.01       | 1             |
| NM_011133  | Pole2         | 1.01       | 1             |
| NM_029716  | Chn1          | 1.02       | 1             |
| NM_177198  | 4833432P19Rik | 1.02       | 1             |
| NM_009905  | Clk1          | 1.02       | 1             |
| NM_183298  | Foxe1         | 1.03       | 1             |
| NM_026952  | Crkrs         | 1.03       | 1             |
| NM_173184  | Rln3          | 1.03       | 1             |
| NM_173016  | AI427515      | 1.03       | 1             |
| NM_009775  | Bzrp          | 1.03       | 1             |
| NM_008391  | Irf2          | 1.03       | 1             |
| NM_019427  | Epb.4.114b    | 1.03       | 1             |
| NM_009558  | Zfp51         | 1.03       | 1             |
| NM_026425  | Nat5          | 1.04       | 1             |
| NM_153564  | Gbp5          | 1.04       | 1             |
| NM_031187  | Tpsab1        | 1.04       | 1             |
| NM_010840  | Mthfr         | 1.05       | 1             |
| NM_028173  | Tram1         | 1.05       | 1             |
| NM_007436  | Aldh3a1       | 1.05       | 1             |
| NM_009250  | Serpini1      | 1.05       | 1             |
| NM_007566  | Birc6         | 1.05       | 1             |
| NM_207244  | Cd200r4       | 1.05       | 1             |
| NM_025441  | Sdccag1       | 1.05       | 2             |
| NM_010136  | Eomes         | 1.06       | 1             |
| NM_134038  | Slc16a6       | 1.06       | 1             |
| NM_177589  | Ulk4          | 1.06       | 1             |
| NM_130881  | Pabpc4        | 1.07       | 1             |
| NM_009929  | Col18a1       | 1.07       | 1             |
| NM_028807  | 1200009I06Rik | 1.07       | 1             |
| NM_027545  | Cwf1912       | 1.07       | 1             |
| NM_011287  | Rpl10a        | 1.07       | 1             |
| NM_178254  | Tcf15         | 1.07       | 1             |

| Ref Number | Gene Symbol   | Log2 Ratio | Num of Probes |
|------------|---------------|------------|---------------|
| NM_011740  | Ywhaz         | 1.07       | 1             |
| NM_175666  | Hist2h2bb     | 1.07       | 1             |
| NM_026127  | 4833420G17Rik | 1.08       | 1             |
| NM_009741  | Bcl2          | 1.08       | 1             |
| NM_175223  | Dnali1        | 1.08       | 1             |
| NM_177888  | Zfp78         | 1.08       | 1             |
| NM_007479  | Arf4          | 1.08       | 1             |
| NM_177326  | Pak2          | 1.09       | 1             |
| NM_153081  | Slc16a11      | 1.09       | 1             |
| NM_011790  | Arih2         | 1.09       | 1             |
| NM_023434  | 5730589K01Rik | 1.09       | 1             |
| NM_175103  | Bola2         | 1.09       | 1             |
| NM_025850  | Fank1         | 1.09       | 1             |
| NM_025979  | Mastl         | 1.1        | 1             |
| NM_008431  | Kcnk4         | 1.1        | 1             |
| NM_007870  | Dnase1l3      | 1.1        | 1             |
| NM_011975  | Rpl27a        | 1.11       | 1             |
| NM_198033  | Als4          | 1.11       | 1             |
| NM_028595  | Ms4a6c        | 1.11       | 1             |
| NM_178615  | Rgmb          | 1.11       | 1             |
| NM_029499  | Ms4a4c        | 1.11       | 1             |
| NM_010280  | Gfra3         | 1.13       | 1             |
| NM_015830  | Solh          | 1.14       | 1             |
| NM_024255  | Hsdl2         | 1.14       | 1             |
| NM_153287  | Axud1         | 1.14       | 1             |
| NM_030676  | Nr5a2         | 1.14       | 2             |
| NM_025858  | Scotin        | 1.14       | 1             |
| NM_025303  | Stau2         | 1.14       | 1             |
| NM_018851  | Samhd1        | 1.15       | 1             |
| NM_133871  | Ifi44         | 1.16       | 1             |
| NM_010062  | Dnase2a       | 1.16       | 1             |
| NM_181570  | Cdk8          | 1.16       | 1             |
| NM_011451  | Sphk1         | 1.16       | 1             |
| NM_177861  | Tmem67        | 1.16       | 1             |
| NM_016739  | Gpiap1        | 1.16       | 1             |
| NM_176948  | 9330133O14Rik | 1.17       | 1             |
| NM_172495  | Ncoa7         | 1.17       | 1             |
| NM_010578  | Itgb1         | 1.18       | 1             |
| NM_177673  | BC046331      | 1.18       | 1             |
| NM_011050  | Pdcd4         | 1.18       | 1             |
| NM_008927  | Map2k1        | 1.18       | 1             |
| NM_023785  | Cxcl7         | 1.19       | 1             |
| NM_133966  | Taf5l         | 1.19       | 1             |
| NM_013886  | Hdgfrp3       | 1.2        | 2             |
| NM_025714  | Odf2l         | 1.2        | 1             |
| NM_145978  | Pdim2         | 1.2        | 1             |
| NM_172435  | P2ry10        | 1.21       | 1             |
| NM_023223  | Cdc20         | 1.21       | 1             |
| NM_008620  | Mpa2          | 1.23       | 1             |
| NM_008662  | Myo6          | 1.23       | 1             |
| NM_178446  | BC013481      | 1.23       | 1             |
| NM_029000  | Gvin1         | 1.24       | 1             |

| Ref Number | Gene Symbol   | Log2 Ratio | Num of Probes |
|------------|---------------|------------|---------------|
| NM_145455  | Btf3          | 1.24       | 1             |
| NM_008741  | Nsg2          | 1.24       | 1             |
| NM_019919  | Ltbp1         | 1.24       | 1             |
| NM_033562  | Derl2         | 1.25       | 1             |
| NM_172988  | Fbxl4         | 1.25       | 1             |
| NM_028898  | 4932417H02Rik | 1.26       | 1             |
| NM_031999  | Gpr137b       | 1.27       | 1             |
| NM_010726  | Phyh          | 1.28       | 1             |
| NM_010261  | Rabac1        | 1.28       | 1             |
| NM_024195  | Cyb5r4        | 1.28       | 1             |
| NM_021338  | Rpl35a        | 1.29       | 1             |
| NM_027617  | Spata1        | 1.29       | 1             |
| NM_029522  | Gpsm2         | 1.3        | 1             |
| NM_147025  | Olf380        | 1.3        | 1             |
| NM_146008  | Tcp11l2       | 1.31       | 1             |
| NM_023215  | 2500003M10Rik | 1.31       | 1             |
| NM_011612  | Tnfrsf9       | 1.32       | 1             |
| NM_007521  | Bach2         | 1.32       | 1             |
| NM_152839  | Igj           | 1.33       | 1             |
| NM_011218  | Ptprs         | 1.33       | 1             |
| NM_010905  | Nfia          | 1.34       | 1             |
| NM_010411  | Hdac3         | 1.34       | 1             |
| NM_172572  | Rhbdf2        | 1.35       | 1             |
| NM_177863  | Frem1         | 1.36       | 1             |
| NM_175394  | Wtap          | 1.38       | 1             |
| NM_010780  | Cma1          | 1.39       | 1             |
| NM_007860  | Dio1          | 1.4        | 1             |
| NM_013621  | Olf69         | 1.41       | 1             |
| NM_146997  | Olf178        | 1.41       | 1             |
| NM_011504  | Stxbp3a       | 1.41       | 1             |
| NM_033552  | Slc4a10       | 1.44       | 1             |
| NM_019926  | Mtm1          | 1.45       | 1             |
| NM_021718  | Ms4a4b        | 1.46       | 1             |
| NM_010059  | Dmc1h         | 1.46       | 1             |
| NM_028266  | Col16a1       | 1.46       | 1             |
| NM_024470  | Klra23        | 1.47       | 2             |
| NM_053146  | Pcdhb21       | 1.47       | 1             |
| NM_145401  | Prkag2        | 1.51       | 1             |
| NM_017376  | Tef           | 1.52       | 1             |
| NM_009104  | Rrm2          | 1.54       | 1             |
| NM_025823  | Pcyox1        | 1.58       | 1             |
| NM_024413  | Plekhf1       | 1.64       | 1             |
| NM_183185  | D930016N04Rik | 1.65       | 1             |
| NM_009437  | Tst           | 1.65       | 1             |
| NM_021538  | Cope          | 1.68       | 1             |
| NM_008331  | Ifit1         | 1.68       | 1             |
| NM_019935  | Ovol1         | 1.7        | 1             |
| NM_153161  | BC037034      | 1.79       | 1             |
| NM_008512  | Lrp1          | 1.8        | 2             |
| NM_023141  | Tor3a         | 1.82       | 1             |
| NM_053229  | V1rb8         | 1.83       | 1             |
| NM_009372  | Tgif          | 1.91       | 1             |

| Ref Number | Gene Symbol | Log2 Ratio | Num of Probes |
|------------|-------------|------------|---------------|
| NM_173369  | Cyld        | 1.91       | 1             |
| NM_011235  | Rad51l3     | 1.92       | 1             |
| NM_019639  | Ubc         | 1.92       | 4             |
| NM_175362  | Card11      | 1.92       | 1             |
| NM_174989  | Ticam1      | 1.94       | 1             |
| NM_009992  | Cyp1a1      | 1.98       | 1             |
| NM_008376  | Gimap1      | 2.22       | 1             |
| NM_008369  | Il3ra       | 2.34       | 1             |
| NM_144924  | Tbc1d17     | 2.55       | 1             |
| NM_008358  | Il15ra      | 2.6        | 1             |
| NM_010397  | H2-T22      | 2.66       | 1             |
| NM_009735  | B2m         | 2.95       | 2             |
| NM_008329  | Ifi204      | 2.95       | 1             |
| NM_007393  | Actb        | 3.43       | 3             |
| NM_007907  | Eef2        | 3.6        | 2             |
| NM_011701  | Vim         | 3.72       | 2             |

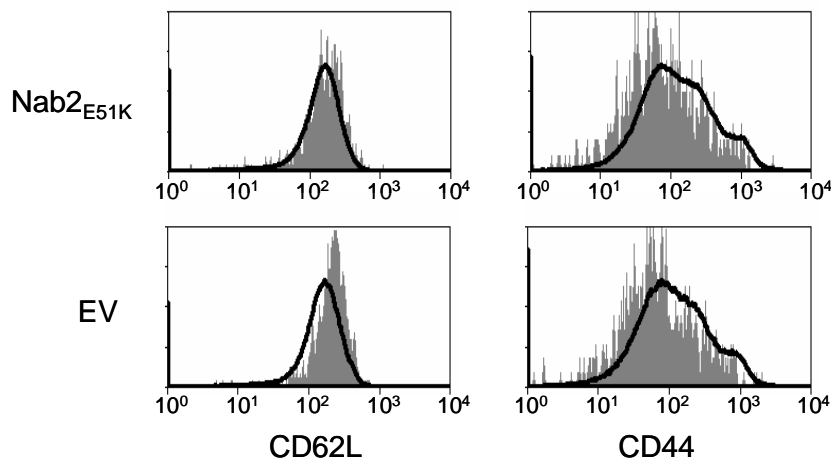

**Figure S1. Expression of CD62L and CD44 of naïve OT-I/Nab2<sub>E51K</sub> and OT-I/EV T cells is comparable to unmanipulated, naïve OT1 T cells.** Nab2<sub>E51K</sub> or the EV-expressing OT-I thymocytes were injected intrathymically into primary recipient mice. Two weeks later, CD8<sup>+</sup> T cells were isolated from spleens and lymph nodes, and CD62L and CD44 expression levels were determined of GFP<sup>+</sup> OTI T cells (filled), and compared to age/sex-matched untreated OT-I T cells (black line).

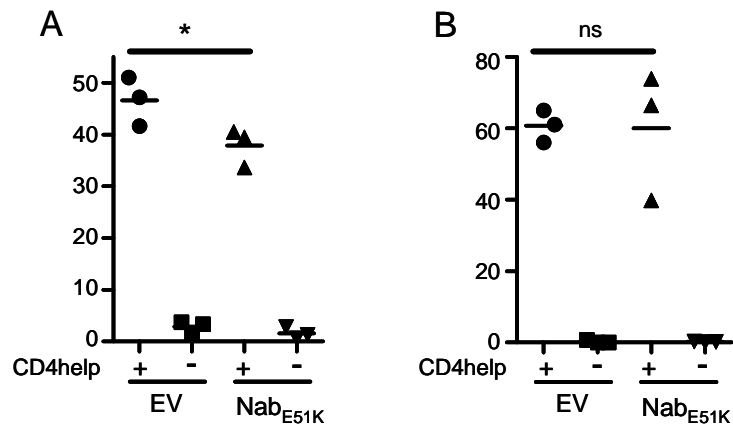

**Figure S2. Secondary expansion of CD8<sup>+</sup> sorted, Nab2<sub>E51K</sub><sup>-</sup>, or EV-expressing T cells**  
 60 naïve OTI-Nab2<sub>E51K</sub><sup>-</sup>, or OTI-EV cells were transferred into C57BL/6J mice prior to immunization with OVA-loaded splenocytes in a helped or helpless setting. 7 days later, CD8<sup>+</sup> T cells were isolated and the amount of OVA<sub>257-264</sub>-specific T cells was determined by K<sup>b</sup>-OVA<sub>257-264</sub> tetramer staining. The number of OVA<sub>257-264</sub>-specific T cells was re-assessed after restimulation with MEC.B7.SigOVA cells for 7 days in a ratio of 25:1. The fold expansion was determined for (A) OTI-Nab2<sub>E51K</sub><sup>-</sup>, or OTI-EV cells, and for (B) the corresponding endogenous OVA<sub>257-264</sub>-specific CD8<sup>+</sup> T cell responses. Each data point represents the CD8<sup>+</sup> T cells pooled from two individual mice, with three biological replicates. \*= $p < 0.05$ .
